# Supplementary material for: Using multiple drug similarity networks to promote adverse drug event detection
Source: PubMed Central journal article supplement — Heliyon. 2024 Nov 5;10(22):e39728. doi: 10.1016/j.heliyon.2024.e39728 (PMC11693886; doi:10.1016/j.heliyon.2024.e39728), 2024-11-05
Supplement: mmc1.pdf [file mmc1.pdf]

**Table A1.** Comparison of AUC for different values of parameter  $\gamma$  for all drug similarity matrices using MGPS signal scores

| $\gamma$ | 0.1   | 0.2   | 0.3   | 0.4   | 0.5   | 0.6   | 0.7   | 0.8   | 0.9   |
|----------|-------|-------|-------|-------|-------|-------|-------|-------|-------|
| atc      | 0.739 | 0.741 | 0.741 | 0.739 | 0.737 | 0.734 | 0.728 | 0.721 | 0.711 |
| chem     | 0.739 | 0.741 | 0.743 | 0.745 | 0.745 | 0.744 | 0.740 | 0.729 | 0.707 |
| seq      | 0.743 | 0.745 | 0.747 | 0.747 | 0.747 | 0.746 | 0.741 | 0.731 | 0.710 |
| go_bp    | 0.737 | 0.738 | 0.739 | 0.737 | 0.732 | 0.724 | 0.712 | 0.695 | 0.671 |
| go_cc    | 0.737 | 0.739 | 0.741 | 0.741 | 0.741 | 0.738 | 0.733 | 0.723 | 0.702 |
| go_mf    | 0.737 | 0.740 | 0.742 | 0.743 | 0.742 | 0.740 | 0.734 | 0.723 | 0.701 |

**Table A2.** Comparison of AUC for different values of parameter  $\gamma$  for all drug similarity matrices using BCPNN signal scores

| $\gamma$ | 0.1   | 0.2   | 0.3   | 0.4   | 0.5   | 0.6   | 0.7   | 0.8   | 0.9   |
|----------|-------|-------|-------|-------|-------|-------|-------|-------|-------|
| atc      | 0.743 | 0.746 | 0.747 | 0.748 | 0.748 | 0.748 | 0.747 | 0.745 | 0.744 |
| chem     | 0.744 | 0.749 | 0.753 | 0.757 | 0.762 | 0.766 | 0.769 | 0.772 | 0.769 |
| seq      | 0.747 | 0.752 | 0.756 | 0.759 | 0.763 | 0.767 | 0.770 | 0.772 | 0.770 |
| go_bp    | 0.740 | 0.743 | 0.745 | 0.747 | 0.747 | 0.746 | 0.743 | 0.736 | 0.720 |
| go_cc    | 0.741 | 0.745 | 0.748 | 0.752 | 0.755 | 0.757 | 0.759 | 0.760 | 0.756 |
| go_mf    | 0.741 | 0.745 | 0.749 | 0.753 | 0.756 | 0.759 | 0.761 | 0.761 | 0.755 |
